# Supplementary material for: Magnetically Recoverable Catalysts Based on Polyphenylenepyridyl Dendrons and Dendrimers
Source: Royal Society of Chemistry journal article supplement (doi:10.1039/c4ra00878b), 2014-01-01
Supplement: c4ra00878b1.pdf [file c4ra00878b1.pdf]

## Electronic Supplementary Information

### **Magnetically Recoverable Catalysts Based on Polyphenylenepyridyl Dendrons and Dendrimers: Control over Nanoparticle Formation and Catalytic Properties**

*Ekaterina Yu. Yuzik-Klimova, Nina V. Kuchkina, Svetlana A. Sorokina, Bethany Boris David Gene Morgan, Linda Zh. Nikoshvili, Nadezhda A. Lyubimova, Valentina G. Matveeva, Esther M. Sulman, Barry D. Stein, Waleed E. Mahmoud, Ahmed A. Al-Ghamdi, Athanasia Kostopoulou, Alexandros Lappas, Zinaida B. Shifrina, Lyudmila M. Bronstein*

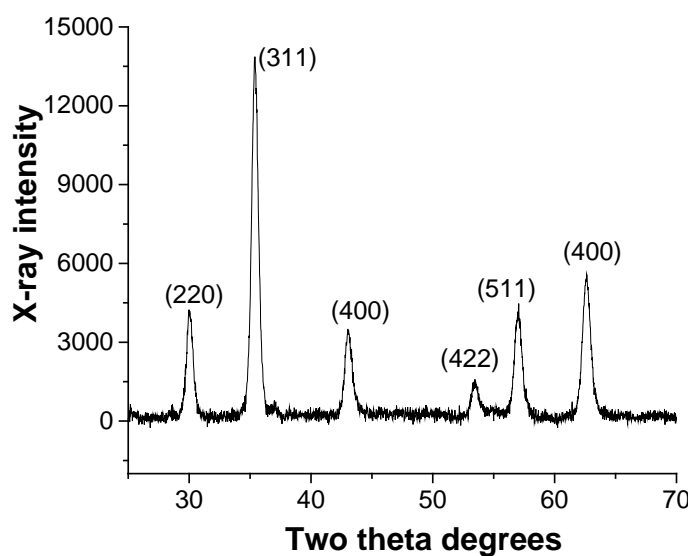

Figure S2. XRD diffraction pattern of NP1-1.

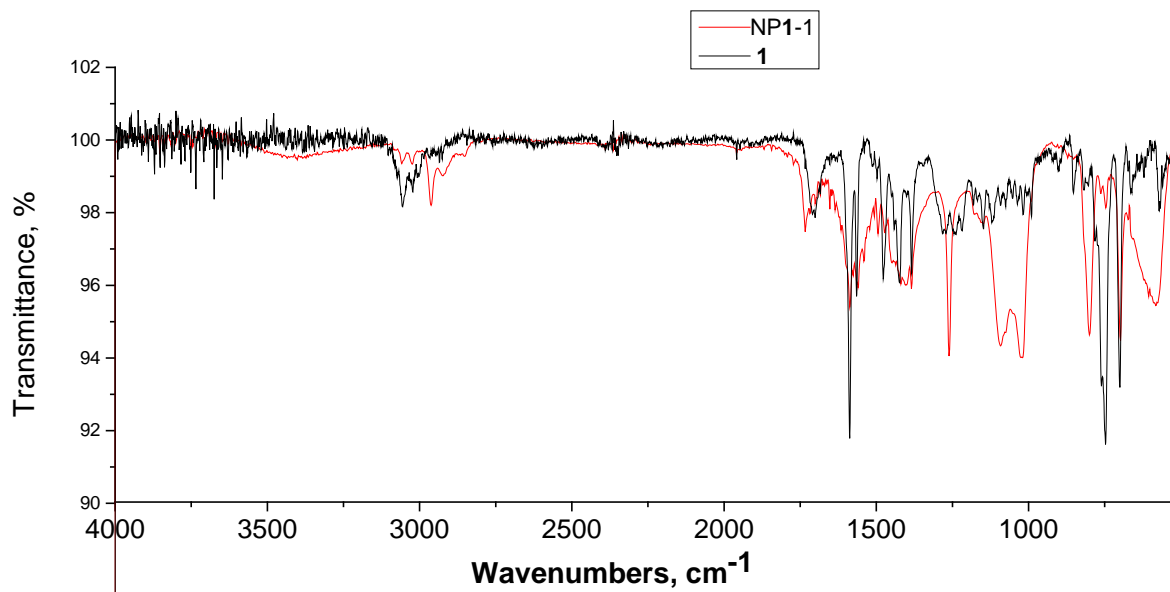

**Figure S2.** FTIR spectra of **1** (black) and NP1-1 (red).

In the FTIR spectrum of **1** (Scheme 1), two bands in the range 770-700  $\text{cm}^{-1}$  can be assigned to out-of-plane deformation of CH. Several bands in the range 1200-950  $\text{cm}^{-1}$  are responsible for vibrations of substituted arenes and pyridine rings. The broad bands in the range 1700-1300  $\text{cm}^{-1}$  are the result of the bands characteristic of skeletal ring breathing modes of aromatic compounds. The weak broad bands in the range 3100-2900  $\text{cm}^{-1}$  are due to =CH stretching modes. The very broad band at 3430  $\text{cm}^{-1}$  is due to water around carboxyl groups. The sharp band at 1704  $\text{cm}^{-1}$  is assigned to C=O of the carboxyl group. In the FTIR spectrum of NP1-1, the majority of the dendron FTIR bands become weaker or much broader because of the adsorption on the NP surface. The strong bands at 1261, 1091, 1026, and 804  $\text{cm}^{-1}$  are associated with Fe-OH vibrations due to migration of acidic protons from capping molecules to iron oxide. The broad band at 582  $\text{cm}^{-1}$  is assigned to the Fe-O vibrations of iron oxide.<sup>1</sup> The bands in the range 3100-2900  $\text{cm}^{-1}$  associated with =CH stretching modes of arenes and pyridine rings

partially weaken and partially shift towards shorter wavenumbers indicating coordination of these rings with Fe ions.

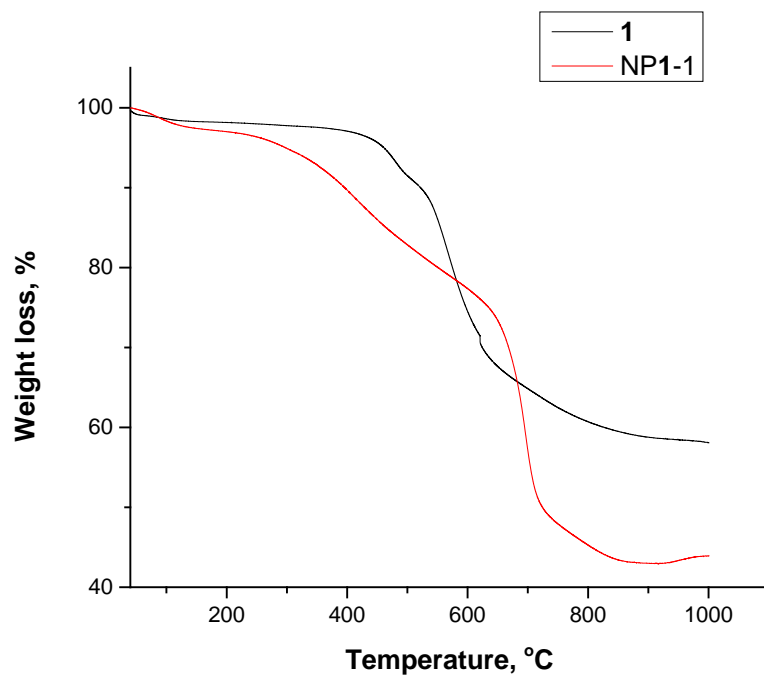

**Figure S3.** TGA traces of **1** (black) and NP1-1 (red).

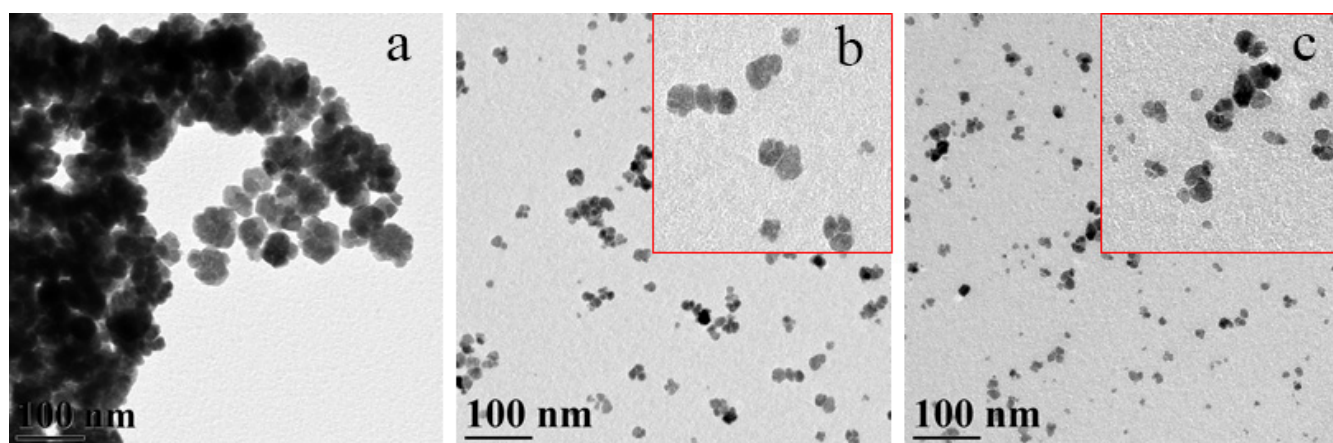

**Figure S4.** TEM images of NP2-1 (a), NP2-2 (b), and NP2-3 (c).

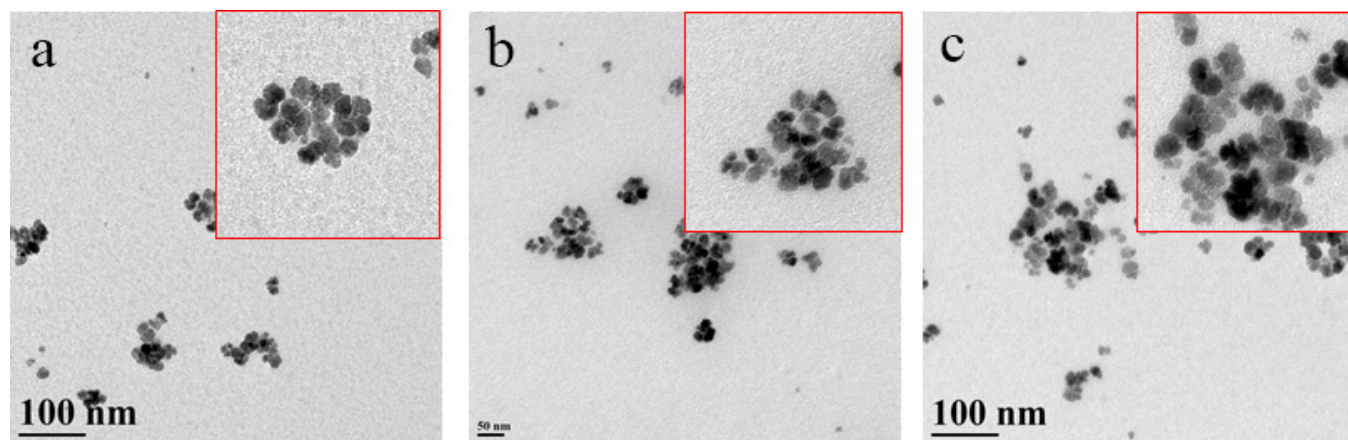

**Figure S5.** TEM images of NP4-1 at the molar ratio of Fe:4 = 1:0.055 (a), NP5-1 and NP5-2 at the molar ratios of Fe:5 = 1:0.077 (b) and 1:0.365 (c), respectively.

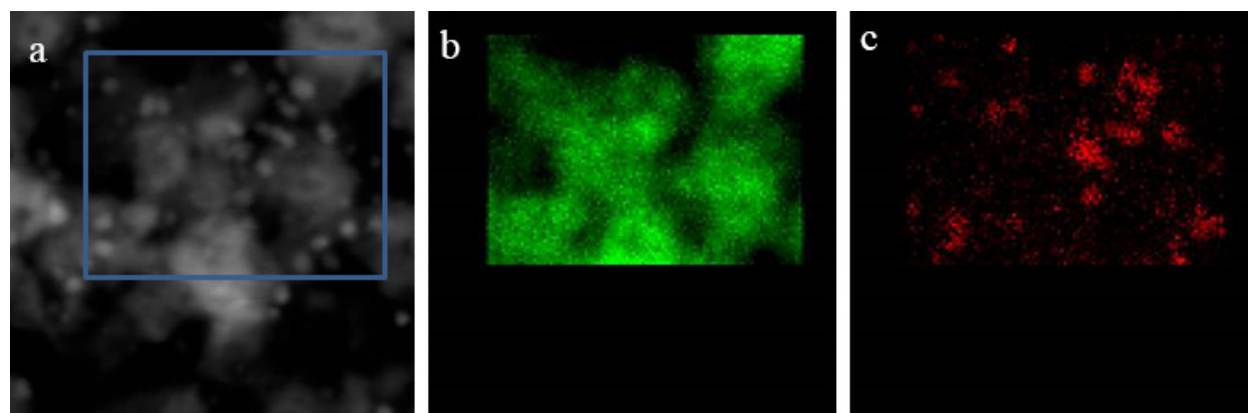

**Figure S6.** Dark-field STEM image (a) and EDS Fe (b) and Pd (c) maps of the NP1-1-PdNP sample

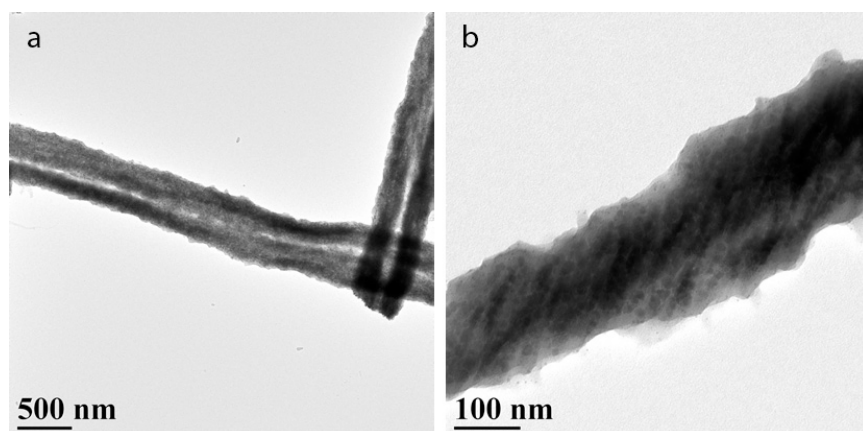

**Figure S7.** TEM images of NP2-1-PdNP at lower (a) and higher (b) magnifications.

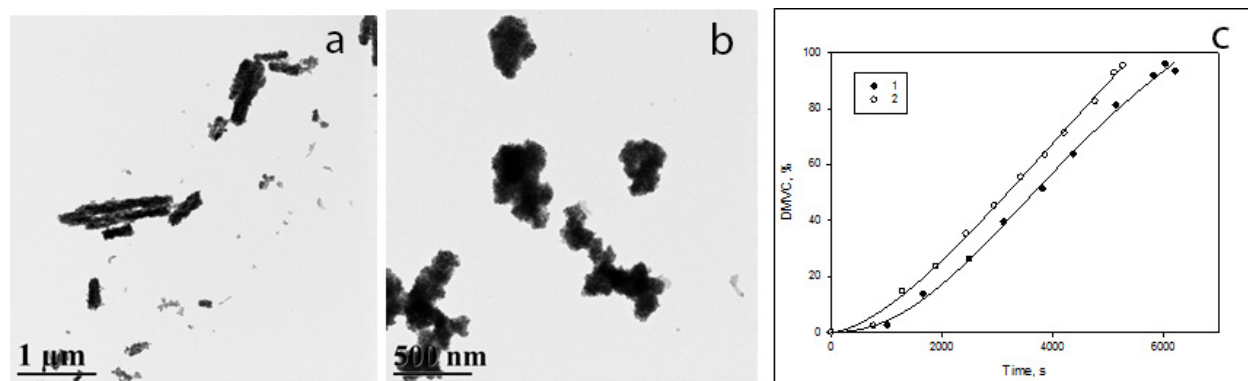

**Figure S8.** TEM images of NP1-1-PdNP-I (a) and NP1-1-PdNP-II (b) obtained with slow and fast addition of Pd acetate, respectively, and kinetic curves of the DMVC accumulation with those catalysts (1 and 2, respectively).

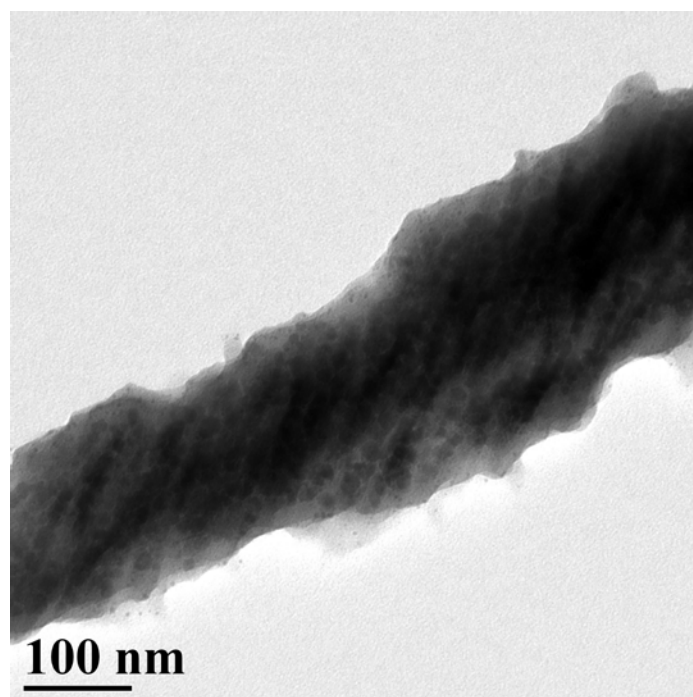

**Figure S9.** TEM image of NP3-1-PdNP.

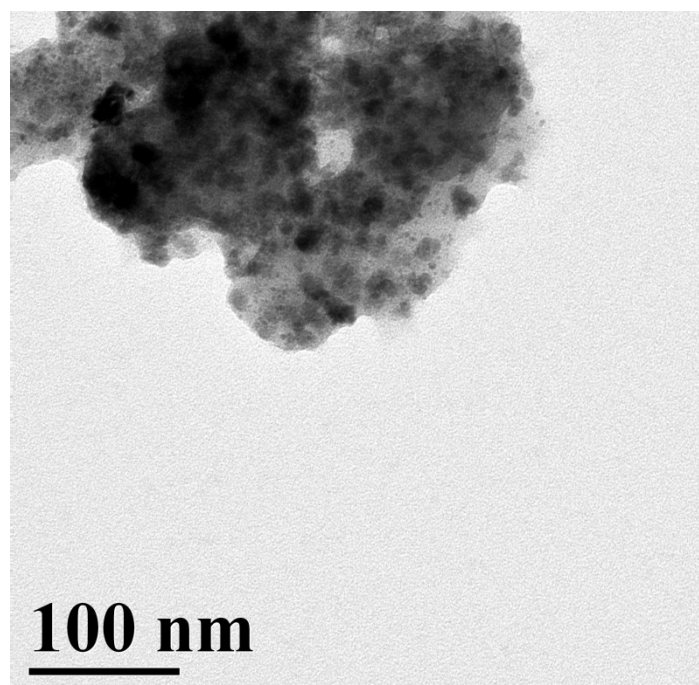

**Figure S10.** TEM image of NP4-1-PdNP after pretreatment with hydrogen before hydrogenation.

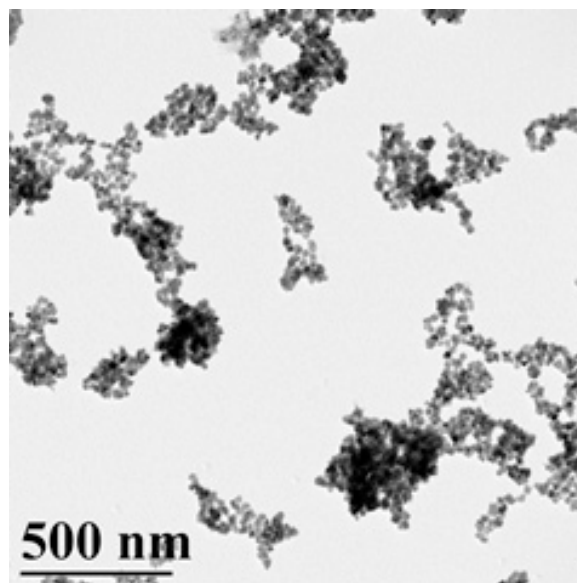

**Figure S11.** TEM image of the NP4-1 after interaction with Pd acetate.

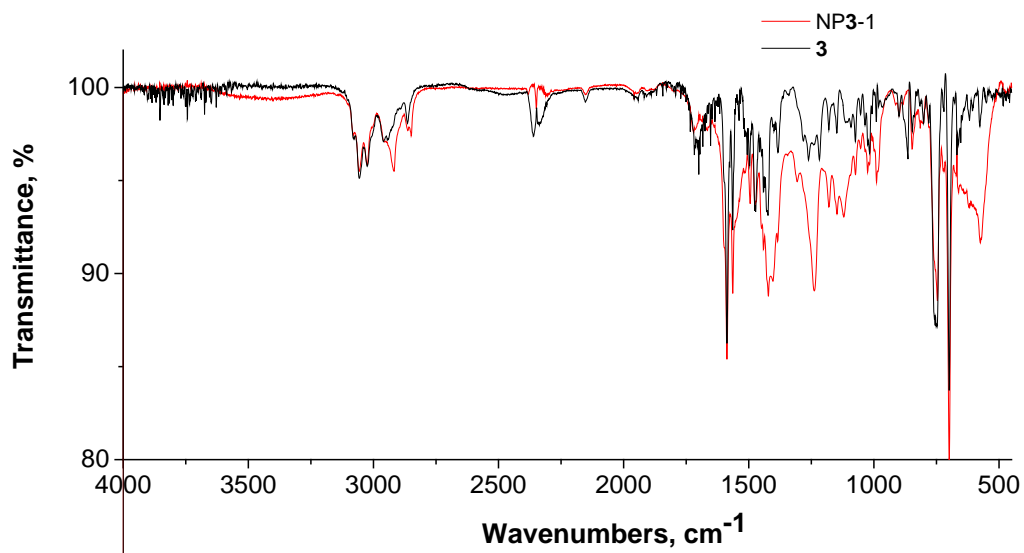

**Figure S12.** FTIR spectra of **3** (black) and NP3-1 (red).

## References

- (1) Hong, R. Y.; Pan, T. T.; Han, Y. P.; Li, H. Z.; Ding, J.; Han, S. J. *Magn. Magn. Mater.* **2006**, *310*, 37.
